# Supplementary material for: A CD4+ T cell reference map delineates subtype-specific adaptation during acute and chronic viral infections
Source: eLife. 2022 Jul 13;11:e76339. doi: 10.7554/eLife.76339 (PMC9323004; doi:10.7554/eLife.76339)
Supplement: Supplementary file 1. [file elife-76339-supp1.xlsx]

## Sheet: Data_S1
	A	Virus	Time after infection	Sample name	Batch	Number cells after filtering	Average Gene Per cell	scTCR	Barcode
	Acute 1	Armstrong	7	d7-Arm-1	1	4115	1808	yes	-
	Acute 2	Armstrong	7	d7-Arm-2	1	4362	1436	yes	-
	Acute 3	Armstrong	7	d7-Arm-3	2	2743	2335	yes	ACCCACCAGTAAGAC
	Early Memory 1	Armstrong	21	d21-Arm-1	2	3043	1414	yes	GGTCGAGAGCATTCA
	Early Memory 2	Armstrong	21	d21-Arm-2	3	4029	1882	-	-
	Late Memory 1	Armstrong	79	d80-Arm-1	1	3777	878	yes	-
	Late Memory 2	Armstrong	79	d80-Arm-2	1	2724	869	yes	-
	Early Chronic 1	Clone 13	7	d7-Cl13-1	2	2184	2263	yes	CTTGCCGCATGTCAT
	Early Chronic 2	Clone 13	7	d7-Cl13-2	2	1729	2243	yes	AAAGCATTCTTCACG
	Late Chronic 1	Clone 13	21	d21-Cl13-1	2	4657	1982	-	-
	Late Chronic 2	Clone 13	21	d21-Cl13-2	3	2125	2120	yes	CTTTGTCTTTGTGAG
	B		Batch
		1	2	3
	Acute	X	X
	Early Memory		X	X
	Late Memory	X
	Early Chronic		X
	Late Chronic		X	X
	C	Organ	Sample name	Number cells after filtering	Average Gene Per cell	Barcode
	MC38 LN 1	dLN	dLN-1	172	2090	ACCCACCAGTAAGAC
	MC38 LN 2	dLN	dLN-2	660	2009	GGTCGAGAGCATTCA
	MC38 TIL 1	Tumor	TIL-1	289	2213	CTTGCCGCATGTCAT
	MC38 TIL 2	Tumor	TIL-2	394	2113	AAAGCATTCTTCACG
