# Supplementary material for: A CD4+ T cell reference map delineates subtype-specific adaptation during acute and chronic viral infections
Source: eLife. 2022 Jul 13;11:e76339. doi: 10.7554/eLife.76339 (PMC9323004; doi:10.7554/eLife.76339)
Supplement: Supplementary file 2. [file elife-76339-supp2.xlsx]

## Sheet: State Signatures
Th1 Effector	Tfh Effector	Tcmp	Th1 Memory	Tfh Memory	Tcm
1500009L16Rik	2310001H17Rik	Actn1	Ahnak	1810026B05Rik	2010107E04Rik
2010111I01Rik	Angptl2	Ccr7	Anxa6	2310001H17Rik	Ccr7
4930453N24Rik	Areg	Klf2	Bhlhe40	2410006H16Rik	Gm10073
Adgre5	Arid5b	Nsg2	Ccl5	Ankrd12	Gm20400
Agpat4	Asap1	Pdlim1	Ccr2	Art2b	Gm28727
Anxa1	AY036118	Tcf7	Cd7	Asap1	Gm9493
Anxa6	B3gnt2	Zfp36	Crip1	Ctla4	Gm9844
Arsb	Cd200		Ctla2a	Ctsb	Il7r
Ccl4	Cd81		Ctsd	Cxcr4	Klf2
Ccl5	Cd83		Ctsw	Ddx24	Rpl10-ps3
Ccr2	Chd4		Cxcr6	Dennd2d	Rps12-ps3
Cd48	Coq10b		Dnajc15	Eea1	S1pr1
Ctla2a	Crem		Dusp5	Egr2	Tob1
Ctsc	Cxcl10		Emp3	Fos
Ctsd	Cxcr4		Epsti1	Fosb
Ctsw	Cxcr5		Fasl	Fyn
Cxcr6	Ddit4		Glipr2	Gapdh
Cyth4	Ddx24		Gna15	Gas5
D16Ertd472e	Dusp1		Gramd3	H2-Q4
Dnajc15	Dusp14		Hopx	Hif1a
Dusp5	Dusp4		Id2	Hnrnpa0
Emp3	Eea1		Ifngr1	Ikzf2
Epsti1	Ephx1		Ifrd1	Il21
Fasl	Fam162a		Il18r1	Inpp4b
Ggt1	Fam43a		Il2rb	Irf2bp2
Gimap7	Fau		Itgb7	Itgal
Glipr2	Fosl2		Klrc1	Itpkb
Glrx	Fus		Klrd1	Izumo1r
Gna15	Fyn		Lgals1	Jarid2
Gzmb	Gapdh		Lgals3	Jun
Gzmk	Gas5		Ly6c2	Lbh
Id2	Gem		Nfkbia	Maf
Ifngr1	Gna13		Nkg7	Malt1
Il12rb2	Gpm6b		Ostf1	Map4k4
Klrc1	Hivep2		Pim1	Mrps6
Lgals3	Hnrnpa0		Rasgrp2	Nfatc1
Ly6c2	Ikzf2		Rgs1	Nfkbid
Mt1	Il21		Rnf138	Nr4a2
Nkg7	Inpp4b		Runx3	Pdcd1
Plac8	Irf2bp2		S100a4	Prkca
Plek	Isg15		S100a6	Ptpn11
Ppp3ca	Isg20		Selplg	Raf1
Rasgrp2	Itgav		Serpinb9	Rgs10
Rgs1	Izumo1r		Sidt1	Rhob
Rnf166	Jak2		Tagln2	Rnaset2a
Rpa2	Jarid2		Vim	Rnf19a
Runx3	Kdm6b		Zyx	Rpl27
S1pr4	Klf4			Rps12
Selplg	Kras			Rps27
Serpinb6b	Lbh			Samsn1
Serpinb9	Maf			Sh2d1a
Slamf1	Malt1			Slamf6
Slamf7	Map4k4			Smco4
Tmem163	Marcksl1			Spry1
Tpst2	Mllt3			Stat1
Zyx	Mrps6			Tbc1d4
	Msi2			Timp2
	Nfatc1			Tle5
	Nfil3			Tnf
	Nfkb1			Tnfrsf4
	Nktr			Tnfsf8
	Nr4a2			Tox
	Nr4a3			Tox2
	Nt5e			Tra2a
	Oxsr1			Trac
	Pde10a			Trbc2
	Per1			Trp53inp1
	Plagl1			Trps1
	Ppp1r14b			Tspan32
	Prkca			Uhrf2
	Ptpn11			Vmp1
	Raf1
	Rel
	Rgs10
	Rgs2
	Rnaset2b
	Rps12
	Rps27
	Rsbn1
	Sesn3
	Sik1
	Smco4
	Socs1
	Socs3
	Sostdc1
	St13
	Stat1
	Stx11
	Stx6
	Tbc1d4
	Tcf7
	Tespa1
	Tiam1
	Timp2
	Tle5
	Tnfaip8
	Tnfrsf4
	Tnfsf11
	Tnfsf8
	Tob2
	Tox
	Tox2
	Trac
	Trbc1
	Trbc2
	Trim8
	Trp53inp1
	Trps1
	Zfp36l1
	Zfp91

## Sheet: Acute Adaptation
Th1.Armd21 > Armd7	Th1.Armd7 > Armd21	Th1.Armd60 > Armd7	Th1.Armd7 > Armd60	Th1.Armd60 > Armd21	Th1.Armd21 > Armd60	Tfh.Armd21 > Armd7	Tfh.Armd7 > Armd21	Tfh.Armd60 > Armd7	Tfh.Armd7 > Armd60	Tfh.Armd60 > Armd21	Tfh.Armd21 > Armd60	Tcm.p..Armd21 > Armd7	Tcm.p..Armd7 > Armd21	Tcm.p..Armd60 > Armd7	Tcm.p..Armd7 > Armd60	Tcm.p..Armd60 > Armd21	Tcm.p..Armd21 > Armd60
AY036118	Gzmb	Il7r	Gzmb	Hspa1a	AY036118	AY036118	Pkm	Il7r	Lgals1	Fam101b	AY036118	Lars2	Lgals1	Il7r	Lgals1	Fam101b	Lars2
Il7r	Lgals3	Hspa1a	Lgals3	Tsc22d3	Lars2	Btg2	Lgals1	Hspa1a	Nfkbia	Hspa1a	Rflnb	AY036118	Vim	Hspa1a	S100a6	Hspa1a	AY036118
Vps37b	Plac8	Dnajb1	Lgals1	Fos	Ighm	Vps37b	S100a6	Jun	Ifi27l2a		Ighm	Il7r	Anxa2	Cebpb	Nkg7		Ighm
Btg2	Vim	Jun	Vim		Ahnak	Il7r	Ly6a	Tsc22d3	Tpi1		Lars2	Vps37b	S100a4		Vim		Rflnb
Lars2	Glrx	Fos	Ifi27l2a		Rora	Bcl2a1b	Tpi1	Hspa1b	S100a6		Bcl2a1b	Arl4c	Batf		Ifi27l2a		Ass1
Arl4c	Ifi27l2a		Anxa2		Rel	Rflnb	Pgam1	Dnajb1	Pkm		Nr4a3	Dtx1	Ly6a		Anxa2		Hsp90b1
Nr4a3	Anxa2		Serpinb6b		Dusp2	Nr4a3	Anxa2	Rhob	Anxa2		Maf	Rflnb	Pgam1		Nfkbia		Dusp2
Kdm6b	Ly6a		S100a11		Kdm6b	Gpr183	Crip1	Fam101b	S100a4		Malt1	Btg2	Rilpl2		S100a4		Rel
Bcl2a1b	Pkm		Lsp1		Bcl2a1b	Klf6	Nfkbia		Tnfrsf4		Hsp90b1	Gpr183	Sh2d1a		S100a10		Btg2
Dtx1	Pycard		Pycard		Hsp90b1	Lars2	Batf		Ldha		Rel	Nr4a3	Slamf6		Batf		Egr1
Neurl3	Cd48		Rilpl2		S100a4	Tob2	Tnfrsf4		Pgam1		Uhrf2	Bcl2a1b	Ctla4		S100a11		Pim1
Fosl2	Sh2d1a		Plac8		Nr4a3	Nr4a1	Vim		Nfkbiz		Rora	Neurl3	Pycard		Nfkbiz		Nfkbiz
Tcf7	Ctla4		Glrx		Hopx	Spty2d1	Gimap5		Crip1		Spty2d1	Tob2	Nkg7		Tcf7		Rora
Gpr183	Rilpl2		Ldha		Hist1h1e	Neurl3	Nkg7		S100a10		Ahnak	Dusp5	Acot7		Pkm		S1pr1
Ccnd2	Ctsd		Pkm		Ass1	Dtx1	Dusp14		Nkg7		Btg2	Ighm	Tpi1		Slamf6		Bcl2a1b
Dennd4a	Pgam1		Epsti1		Plek	Malt1	Cst7		Lsp1		Atp2b1	Ass1	Lgals3		Rilpl2		Satb1
Tob2	Acot7		S100a4		Pim1	Egr2	Stx11		Rilpl2		Bcl2a1d	Hsp90b1	Dnajc15		Lsp1		Kdm6b
Bcl2a1d	Tpi1		Bhlhe40		Atp2b1	Jun	Cd83		Icos		Nfkb1	Kdm6b	Zbtb32		Ldha		Nr4a3
Ighm	Id2		Ctla4		Dennd4a	Zfp36l2	Fam110a		Batf		Pim1	Rgs1	Gimap5		Sh2d1a		Tcf7
Zfp36l1	Cxcr6		Cd48		Uhrf2	Fosb	Ccdc28b		Aldoa		Kdm6b	Crem	Pim2		Serpinb6b		Ahnak
Rel	Zyx		Cxcr6		Serpinb6b	Maf	Pycard		Pim1		S1pr1	Cdk11b	Tox2		Pgam1		Dtx1
Crem	Glipr2		Selplg		Maf	Ighm	Rilpl2		Slamf6		Hopx	Cebpb	Plac8		Tpi1		Tob2
Ass1	Ptms		Plek		Serpinb9	Cwc25	Pim2		Gimap5		Itgb1		Tnfrsf4		Pycard		Bcl2a1d
Spty2d1	Ggt1		Sh2d1a		Bcl2a1d	Nfkbid	Nfkbiz		Stx11		Tox		Anxa6		Ctla4		Uhrf2
Nfkbid	Serpinb6b		Anxa6		Gramd3	Lmo4	Fam162a		Ccdc28b		S100a4		Fam110a		Acot7		Cited2
Nr4a2	Gzmk		Nfkbiz		Nfkb1	Hsp90b1	Mmd		Tox		Tob2		Cstb		Pim2		Maf
Runx3	Mt1		Ctsd		Nfkbiz	Crem	Mrps6		Dusp14		Ass1		Ccdc28b		Ahnak		Zfp36l1
Cdk11b	Batf		Dnajc15		Chd7	Art2b	Mt3		Mrps6		Tbc1d4		Cst7		Pim1		Nfkbia
Plcxd2	Ctsc		Nfkbia		Furin	Arl4c	Ctsw		Bhlhe40		Selenop		Arl5c		Lgals3		Itgb1
	Ifi47		Acot7		Hist1h1c	Atp2b1	Ddit4		Serpinb6b		Mpp7		Serpinb6b		Tnfrsf4		S100a4
	Ctsw		Serpinb9		Malt1	Cdk11b	Cstb		Vim		Eea1		Bhlhe40		Sh2d2a		Cd69
	Cst7		Ptms		Satb1	Ramp3	Selplg		Epsti1		Gramd3		Ccr7		Cstb
	Fam110a		Adgre5		S1pr1	Bcl2a1d	Tagln2		Oxsr1		Art2b		Cd48		Gimap5
	Cstb		Tpi1		Crem	Samsn1	Dnajc15		Tox2		Zfp36l1				Icos
	Stx11		Pgam1		Btg2	Tnf	Pdcd1		Sh2d1a		Rgs2				Ighm
	Phlda1		Tnfrsf4		Tob2	Trib2			Pycard		Egr2				Mrps6
	Zbp1		Ctsc		Tpm4	Egr1			Marcksl1		Crem				Itgb1
			Ahnak		Dtx1	Cxcr4			Sh2d2a		Bcl6				Tox2
			Gna15		Ccnd2	Eprs			Fam162a		Cited2				Rora
			Zyx		Ccr2	Maff			Cd83		Slc41a1				Plac8
			Glipr2		Nr4a2	Tbc1d4			Ikzf2		Satb1				Arl5c
			Id2			Kdm6b			Ptms		Tcf7				Pou2f2
			Phlda1			Rgs2			Mt3		Trib2				Ccdc28b
			Aldoa						Fam110a		Kcnq1ot1				Ikzf3
			Hif1a						Ctsd		Vps37b				Zbtb32
			Batf						Pim2		Ikzf2				Cd69
			Ccr2						Ddit4		Neurl3				Bhlhe40
			Sh2d2a						Hif1a		Cwc25				Gadd45b
			Rora						Cd200		Tnfsf8				Actn1
			Stx11						Dnajc15		Nfkbiz				Hif1a
			Stat1						Ctsw		Dusp2				Tox
			Slamf7						Ighm		Nfkbia				Ptms
			Mt1						Mmd		Ifng				Anxa6
			Ggt1						Ahnak						Epsti1
			Gpr171						Traf1						Uhrf2
			Anxa1						Itgb1						Fam110a
			Hsp90b1						Mir155hg						Zyx
			Gimap7						Sostdc1						Id3
			Zbp1						Cxcl10						Selplg
			Tpm4						Il21						Traf1
			Pdcd1						Npm1						Adgre5
			Dusp2						Cd160						Izumo1r
			Ddit4						Rgs10						Dnajc15
			Samhd1						Lars2
			Gzmk
			Fam110a
			Ctla2a
			Klrc1

## Sheet: Chronic Adaptation
Th1.Cl13d7 > Armd7	Th1.Armd7 > Cl13d7	Th1.Cl13d21 > Cl13d7	Th1.Cl13d7 > Cl13d21	Th1.Cl13d21 > Armd21	Th1.Armd21 > Cl13d21	Tfh.Cl13d7 > Armd7	Tfh.Armd7 > Cl13d7	Tfh.Cl13d21 > Cl13d7	Tfh.Cl13d7 > Cl13d21	Tfh.Cl13d21 > Armd21	Tfh.Armd21 > Cl13d21	Tcm(p).Cl13d7 > Armd7	Tcm(p).Armd7 > Cl13d7	Tcm(p).Cl13d21 > Cl13d7	Tcm(p).Cl13d7 > Cl13d21	Tcm(p).Cl13d21 > Armd21	Tcm(p).Armd21 > Cl13d21
Lag3	Dusp1	Dnajc15	Dusp1	Ifi27l2a	Il7r	Ighm	Fos	Tpi1	Maf	Tnfrsf4	Rflnb	Lag3	Fos	Tnfrsf4	Rflnb	Tnfrsf4	Gpr183
Ighm	Ccr2	Vim	Rgs2	Lag3	Gpr183	Bhlhe40	Tesc	Pgam1	Cxcr4	Bhlhe40	Tesc	Ighm		Bhlhe40	Tesc	Bhlhe40	Rflnb
Pdcd1	Zfp36	Gzmb	Cxcr4	Pdcd1	Gramd3	Fosl2	Zfp36	Fam110a	AY036118	Ly6a	Gpr183	Rtp4		Ly6a	Gpr183	Lag3	Satb1
Lars2		Lgals3	Nr4a2	Tox	Dnajc15	Coq8a		Bnip3	Ahnak	Lag3	Actn1	Tnfrsf4		Lag3	Actn1	Ctla4	Tesc
Rgs16		Selplg	Tox	Ptms	Ly6c2	Rtp4		Rgs10	Bcl2a1b	Ptms	Neurl3	Rgs16		Ptms	Neurl3	Ptms	Actn1
Tnfrsf4		Anxa2	Cebpb	Ctla4	Satb1	Bst2		Marcksl1	Klf6	S100a6	Egr2	Lars2		S100a6	Egr2	Ly6a	Dtx1
AY036118		Plac8	Maf	Izumo1r	Ccr2	Lag3		Ddit4	S1pr1	Eea1	Satb1	Dusp2		Eea1	Satb1	Tox	Arl4c
Rtp4		Tagln2	Ier5l	Tnfrsf4	Dtx1	Eea1		Slc16a3	Samsn1	Lgals1	Dtx1	Fosl2		Lgals1	Dtx1	Zbtb32
Dusp2		Epsti1	Samsn1	Rgs16	Ifngr1	Lars2		Selplg	Trps1	Tox	Nsg2	Pdcd1		Tox	Nsg2	Ikzf2
Mt1		Ifngr1	Izumo1r	Ikzf2	Hopx	Tnfrsf4		Cd160	Fos	Ctla4	Zfp36	Sdf4		Ctla4	Zfp36	Sostdc1
Sh2d2a		Serpinb6b	Ccnd2	Eea1	Ctla2a	Ddit4		Pim2	Ccnd2	Batf		Bst2		Batf		Hif1a
Ddit4		Zyx	Areg	Ly6a	Tcf7	Rgs16		Rilpl2	Fosb	Sdf4		Bhlhe40		Sdf4		S100a4
Siah2		Anxa6	Rgs1	Areg	Klrd1	Pdcd1		Sh2d2a	Klf2	S100a4		Marcksl1		S100a4		Eea1
Gzmb		Ly6c2	Gem	Dusp1	Klf2	Nr4a2		Cd68	Hist1h1c	Dusp14		Siah2		Dusp14		Areg
Serpinb6b		Adgre5	Tob2	Stat1	Il18r1	Vps37b		Cd83	Ier5l	Bcl2		Dusp14		Bcl2		Pdcd1
Eea1		Acot7	Hspa1a	Nfil3	S1pr1	Ifrd1		Fam162a	Il7r	Ahnak		AY036118		Ahnak		Ahnak
Oxsr1		Rilpl2	Spry1	Samsn1	Neurl3	Il1r2		Cst7	Hspa1a	Pde10a		Lgals3		Pde10a		Dusp14
Ptms		Glipr2	Ikzf2	Cst7	Arl4c	Siah2		Ctsw	Ifng	Tiam1		Sdhaf1		Tiam1		Nfil3
Tox		Mt1	Fos	Dusp14		AY036118		Matk	Spry1	Nfil3		Oxsr1		Nfil3		Batf
Fam110a		Cxcr6	Trps1	Rtp4		Nr4a3		Pim1	Spty2d1	Sostdc1		Ddit4		Sostdc1		Tox2
Zbp1		Ggt1	Fosl2	Tox2		Nfil3		Cxcr5	Hist1h1e	Stx11		Zbp1		Stx11		Pde10a
Ctla4		Ctsw	Tnfsf8	Maf		Ccr8		Serpinb6b	Hspa1b	Anxa2		Ass1		Anxa2		Anxa2
D16Ertd472e		Fam110a	Serpina3g	Serpina3g		Klf4		Pdcd1	Art2b	Stat1		Samhd1		Stat1		Tiam1
Rel		Gramd3	Bcl2a1b	Nr4a2		Pim1		Vim	Snhg15	Cxcr4		Il7r		Cxcr4		Cxcl10
Cited2		Tpi1	Nr4a3	Ddit4		Rel		Thada	Gata3	Bst2		Ptms		Bst2		Ier5l
Nr4a2		Il12rb2	Spty2d1	Ier5l		Marcksl1		Lgals3	Pmaip1	Cacna1d		Fam110a		Cacna1d		Uhrf2
		Pgam1	Hist1h1e	Gzmk		Cd81		Ikzf3	Cacna1d	Ikzf2		Nr4a2		Ikzf2		Fam43a
		Glrx	Pim3	Gem		Dusp14		Dusp14	Igf1r	Fosl2		Stat1		Fosl2		Nr4a2
		Rasgrp2	Art2b	Ccdc28b		Ass1		Ass1	Tshz2	Samhd1		Tpi1		Samhd1		Lgals3
		Ctla2a		Cebpb		Samhd1		Hilpda	Sostdc1	Ier5l				Ier5l		Lgals1
		Anxa1		Lgals3		Tbc1d4		Anxa2	Pde10a	Rtp4				Rtp4		Rtp4
		Adam8		Bhlhe40		Bace2			Arl4c	Gem				Gem		Gem
		Gna15		Ube2l6		Oxsr1			Trib2	Ccdc28b				Ccdc28b		Ccdc28b
		Gpr18		Glrx		Dusp4			Il21	Pdcd1				Pdcd1		Pmaip1
		Pycard		Zbtb32		Fam110a				Klf4				Klf4		Stx11
		Serpinb9		Batf		Nr4a1				Uhrf2				Uhrf2		Capg
		Satb1		Anxa2		Kdm6b				Cxcl10				Cxcl10		Cd81
		D16Ertd472e		Zbp1		Itgav				Ifi204				Ifi204		Fosl2
		Gpr183		Oxsr1		Sdhaf1				Capg				Capg		Bcl2
		Chit1		Spry1		Zbp1				Dusp4				Dusp4		Cxcr4
		Mt2		Mmd		Tob2				Oxsr1				Oxsr1		Slamf6
		Crip2		Itgav		Areg				Zbtb32				Zbtb32		Dusp4
		Il18r1		Hspa1a		Rora				Vim				Vim		Dusp1
		Rom1		Hif1a		Rgs2				Socs1				Socs1		Stat1
				Uhrf2		Btg2				Cd200				Cd200		Samsn1
				Sh2d1a		Gramd3				Rgs16				Rgs16		Rgs16
				Rgs2		Lgals3				Areg				Areg		Pou2f2
				Ccl4		Cd83				Il21				Il21		Nfkb1
				Capg		Hilpda				Ddit4				Ddit4		Cd200
				Ccl3		Cxcl10				Pou2f2				Pou2f2		Izumo1r
				Stx11		Socs1				Ifrd1				Ifrd1		Samhd1
				Bst2						Cd81				Cd81		Spry1
				Tbc1d4						Itgav				Itgav		Sdf4
				Ikzf3						Zbp1				Zbp1		Ms4a6c
				Cxcr4						Emp3				Emp3		Plscr1
				Prdm1						Plagl1				Plagl1		Oxsr1
				Trps1						Cd83				Cd83		Tnfsf8
				Gpr65						Pmaip1				Pmaip1		Bst2
				Rilpl2						Hist1h1e				Hist1h1e		Itgav
				Plscr1						Gata3				Gata3		Socs1
				Cstb						Tpi1				Tpi1		Rel
				Socs1						Tpm4				Tpm4		Trps1
				Art2b						Gpm6b				Gpm6b		Klf4
				Tnfsf8						Angptl2				Angptl2		Plek
				Pim3						Id2				Id2		Ccnd2
				Siah2												Traf1
				Pmaip1												Ddit4
				Gadd45b												Rilpl2
																Zbp1
																Gadd45b
																Gata3
																Slfn5
																Rgs2
																Vim
																Rnf213
																Odc1
																Sdhaf1
																Maf
																Ms4a4c
																Tbc1d4
																Sh2d1a
																Nfkbiz
																Ifrd1
																Hist1h1e
																Mxd1
																Gimap5
																Pycard
																Siah2
																Nr4a3
																Kdm6b
