# Supplementary material for: A CD4+ T cell reference map delineates subtype-specific adaptation during acute and chronic viral infections
Source: eLife. 2022 Jul 13;11:e76339. doi: 10.7554/eLife.76339 (PMC9323004; doi:10.7554/eLife.76339)
Supplement: Supplementary file 3. [file elife-76339-supp3.xlsx]

## Sheet: XX_XY
Male vs. Female Genes
0610007P14Rik
0610011F06Rik
1110001J03Rik
1810043H04Rik
2210013O21Rik
2310036O22Rik
2700029M09Rik
2700060E02Rik
2700094K13Rik
2810428I15Rik
2900097C17Rik
A430093F15Rik
Abraxas2
Adrbk1
Aim1
Apoa1bp
Atp5md
Atp5mpl
Atp5o.1
BC029214
BE692007
Bicdl1
Bicra
Bmt2
Bud23
CAAA01118383.1
Carmil2
Cct6a
Cecr5
Cenpx
Chmp1b
Ciao2a
Ciao2b
Cop1
Cops9
Coq8a
Cpsf3l
Crybg1
Ddx3y
DHRSX
Dleu2
Dmac1
Dmac2
Dpcd
Eef1akmt1
Eef1akmt2
Efl1
Eif2s3y
Eipr1
Eloa
Elob
Eloc
Erbb2ip
Erbin
Erg28
Fam101b
Fam134a
Fam134b
Fam188a
Fam195b
Fam65b
Fmc1
Ftl1-ps1
Gatd1
Gbp6
Gltscr2
Gm10020
Gm10094
Gm10116
Gm10250
Gm10263
Gm10709
Gm17018
Gm21092
Gm2682
Gm30054
Gm42031
Gm44160
Gm45552
Gm45716
Gm5424
Gm561
Gm5616
Gm5786
Gm6483
Gm7808
Gm8730
Gm9843
Gnb2l1
Grk2
Gstp3
Hdgfl2
Hdhd5
Hiat1
Hiatl1
Hmha1
Hn1
Hpf1
Ict1
Ifi206
Ifi209
Ifi211
Ifi213
Ifi214
Ighm
Ints11
Ints13
Jpt1
Kmt5a
Kmt5b
l7Rn6
Lnpk
Lsm7
Maip1
Mcrip1
Mesd
Mettl10
Mettl26
Mfsd14a
Mfsd14b
Mia2
Mina
Mindy2
Mindy3
Mrpl58
Myeov2
N6amt2
Naxd
Naxe
Nbdy
Ndnl2
Ndufaf8
Ndufb1-ps
Ngfrap1
Nhp2l1
Nipsnap2
Nop53
Nsd2
Nsd3
Nsmce3
Oga
Oip5os1
Paxx
Pddc1
Pgk1-rs7
PISD
Plpbp
Ppp2r4
Ppp4r3a
Ppp4r3b
Prelid3b
Ptpa
Pydc4
Rab5if
Rack1
Retreg1
Retreg2
Retreg3
Rex1bd
Rflnb
Ric8a
Riox2
Ripor2
Rpl13-ps3
Rpl23a-ps3
Rpl36-ps3
Rpl36a-ps1
Rpl6l
Rps26-ps1
Rtf2
Rtfdc1
Rtraf
Selenof
Selenoh
Selenok
Selenop
Selenos
Selenot
Selenow
Selk
Selt
Sem1
Sep15
Sepp1
Sepw1
Shfm1
Slmo2
Smek1
Smek2
Smim26
Smim27
Snu13
Srp54a
Ss18l2
Stra13
Tasor
Tceal9
Tceb1
Tceb2
Tceb3
Tent5c
Thap12
Tmem131l
Tmem179b
Tmem261
Toporsos
Trir
Tug1
Ufd1
Ufd1l
Utp11
Utp11l
Uty
Vimp
Virma
Vps28
Washc1
Washc2
Washc3
Washc4
Wbp5
Wbscr22
Whsc1l1
Xist
Zfas1
Zfos1

## Sheet: Variable genes blocklist
cellCycle.G1S	cellCycle.G2M	HeatShock	Mito	Ribo	IfnResp	TCR
Atad2	Anln	C1qbp	mt-Atp6	Rpl10	Ifit1	Tradd
Blm	Anp32e	Eif4a1	mt-Atp8	Rpl10-ps1	Ifit1bl1	Traj1
Brip1	Aurka	Fbl	mt-Co1	Rpl10-ps2	Ifit1bl2	Traj11
Casp8ap2	Aurkb	Hsp90aa1	mt-Co2	Rpl10-ps3	Ifit2	Traj12
Ccne2	Birc5	Hspd1	mt-Co3	Rpl10-ps4	Ifit3	Traj13
Cdc45	Bub1	Hspe1	mt-Cytb	Rpl10-ps5	Ifit3b	Traj14
Cdc6	Cbx5	Mif	mt-Nd1	Rpl10-ps6	Ifitm1	Traj15
Cdca7	Ccnb2	Ncl	mt-Nd2	Rpl10a	Ifitm10	Traj16
Chaf1b	Cdc20	Nhp2	mt-Nd3	Rpl10a-ps1	Ifitm2	Traj17
Clspn	Cdc25c	Nme1	mt-Nd4	Rpl10a-ps2	Ifitm3	Traj18
Dscc1	Cdca2	Nolc1	mt-Nd4l	Rpl10a-ps3	Ifitm5	Traj19
Dtl	Cdca3	Nop58	mt-Nd5	Rpl10a-ps4	Ifitm6	Traj2
E2f8	Cdca8	Pa2g4	mt-Nd6	Rpl10l	Ifitm7	Traj20
Exo1	Cdk1	Ran	mt-Rnr1	Rpl11	Irf1	Traj21
Fen1	Cenpa	Ranbp1	mt-Rnr2	Rpl12	Irf2	Traj22
Gins2	Cenpe	Set	mt-Ta	Rpl12-ps1	Irf2bp1	Traj23
Gmnn	Cenpf	Tuba1b	mt-Tc	Rpl12-ps2	Irf2bp2	Traj24
Hells	Ckap2	NA	mt-Td	Rpl13	Irf2bpl	Traj25
Mcm2	Ckap2l	NA	mt-Te	Rpl13-ps1	Irf3	Traj26
Mcm4	Ckap5	NA	mt-Tf	Rpl13-ps2	Irf4	Traj27
Mcm5	Cks1b	NA	mt-Tg	Rpl13-ps3	Irf5	Traj28
Mcm6	Cks2	NA	mt-Th	Rpl13-ps4	Irf6	Traj29
Msh2	Ctcf	NA	mt-Ti	Rpl13-ps5	Irf7	Traj3
Nasp	Dlgap5	NA	mt-Tk	Rpl13-ps6	Irf8	Traj30
Pcna	Ect2	NA	mt-Tl1	Rpl13a	Irf9	Traj31
Pola1	G2e3	NA	mt-Tl2	Rpl13a-ps1	Isg15	Traj32
Pold3	Gas2l3	NA	mt-Tm	Rpl14	Isg20	Traj33
Prim1	Gtse1	NA	mt-Tn	Rpl14-ps1	Isg20l2	Traj34
Rad51	Hjurp	NA	mt-Tp	Rpl15	NA	Traj35
Rad51ap1	Hmgb2	NA	mt-Tq	Rpl15-ps1	NA	Traj36
Rfc2	Hmmr	NA	mt-Tr	Rpl15-ps2	NA	Traj37
Rpa2	Kif11	NA	mt-Ts1	Rpl15-ps3	NA	Traj38
Rrm1	Kif20b	NA	mt-Ts2	Rpl15-ps4	NA	Traj39
Rrm2	Kif23	NA	mt-Tt	Rpl15-ps5	NA	Traj4
Slbp	Kif2c	NA	mt-Tv	Rpl15-ps6	NA	Traj40
Tipin	Lbr	NA	mt-Tw	Rpl17	NA	Traj41
Tyms	Mki67	NA	mt-Ty	Rpl17-ps1	NA	Traj42
Ubr7	Ncapd2	NA	NA	Rpl17-ps10	NA	Traj43
Uhrf1	Ndc80	NA	NA	Rpl17-ps11	NA	Traj44
Ung	Nek2	NA	NA	Rpl17-ps2	NA	Traj45
Usp1	Nuf2	NA	NA	Rpl17-ps3	NA	Traj46
Wdr76	Nusap1	NA	NA	Rpl17-ps4	NA	Traj47
NA	Psrc1	NA	NA	Rpl17-ps5	NA	Traj48
NA	Rangap1	NA	NA	Rpl17-ps6	NA	Traj49
NA	Smc4	NA	NA	Rpl17-ps7	NA	Traj5
NA	Tacc3	NA	NA	Rpl17-ps8	NA	Traj50
NA	Tmpo	NA	NA	Rpl17-ps9	NA	Traj51
NA	Top2a	NA	NA	Rpl18	NA	Traj52
NA	Tpx2	NA	NA	Rpl18-ps1	NA	Traj53
NA	Ttk	NA	NA	Rpl18-ps2	NA	Traj54
NA	Tubb4b	NA	NA	Rpl18a	NA	Traj55
NA	Ube2c	NA	NA	Rpl18a-ps1	NA	Traj56
NA	NA	NA	NA	Rpl18a-ps2	NA	Traj57
NA	NA	NA	NA	Rpl18a-ps3	NA	Traj58
NA	NA	NA	NA	Rpl18a-ps4	NA	Traj59
NA	NA	NA	NA	Rpl19	NA	Traj6
NA	NA	NA	NA	Rpl19-ps1	NA	Traj60
NA	NA	NA	NA	Rpl19-ps10	NA	Traj61
NA	NA	NA	NA	Rpl19-ps11	NA	Traj7
NA	NA	NA	NA	Rpl19-ps12	NA	Traj8
NA	NA	NA	NA	Rpl19-ps2	NA	Traj9
NA	NA	NA	NA	Rpl19-ps3	NA	Trav1
NA	NA	NA	NA	Rpl19-ps4	NA	Trav10
NA	NA	NA	NA	Rpl19-ps5	NA	Trav10d
NA	NA	NA	NA	Rpl19-ps6	NA	Trav10n
NA	NA	NA	NA	Rpl19-ps7	NA	Trav11
NA	NA	NA	NA	Rpl19-ps9	NA	Trav11d
NA	NA	NA	NA	Rpl21	NA	Trav11n
NA	NA	NA	NA	Rpl21-ps1	NA	Trav12-1
NA	NA	NA	NA	Rpl21-ps10	NA	Trav12-2
NA	NA	NA	NA	Rpl21-ps11	NA	Trav12-3
NA	NA	NA	NA	Rpl21-ps12	NA	Trav12-4
NA	NA	NA	NA	Rpl21-ps13	NA	Trav12d-1
NA	NA	NA	NA	Rpl21-ps14	NA	Trav12d-2
NA	NA	NA	NA	Rpl21-ps15	NA	Trav12d-3
NA	NA	NA	NA	Rpl21-ps2	NA	Trav12n-1
NA	NA	NA	NA	Rpl21-ps3	NA	Trav12n-2
NA	NA	NA	NA	Rpl21-ps4	NA	Trav12n-3
NA	NA	NA	NA	Rpl21-ps5	NA	Trav13-1
NA	NA	NA	NA	Rpl21-ps6	NA	Trav13-2
NA	NA	NA	NA	Rpl21-ps7	NA	Trav13-3
NA	NA	NA	NA	Rpl21-ps8	NA	Trav13-4-dv7
NA	NA	NA	NA	Rpl21-ps9	NA	Trav13-5
NA	NA	NA	NA	Rpl22	NA	Trav13d-1
NA	NA	NA	NA	Rpl22-ps1	NA	Trav13d-2
NA	NA	NA	NA	Rpl22l1	NA	Trav13d-3
NA	NA	NA	NA	Rpl23	NA	Trav13d-4
NA	NA	NA	NA	Rpl23a	NA	Trav13n-1
NA	NA	NA	NA	Rpl23a-ps1	NA	Trav13n-2
NA	NA	NA	NA	Rpl23a-ps10	NA	Trav13n-3
NA	NA	NA	NA	Rpl23a-ps11	NA	Trav13n-4
NA	NA	NA	NA	Rpl23a-ps12	NA	Trav14-1
NA	NA	NA	NA	Rpl23a-ps13	NA	Trav14-2
NA	NA	NA	NA	Rpl23a-ps14	NA	Trav14-3
NA	NA	NA	NA	Rpl23a-ps2	NA	Trav14d-1
NA	NA	NA	NA	Rpl23a-ps3	NA	Trav14d-2
NA	NA	NA	NA	Rpl23a-ps4	NA	Trav14d-3-dv8
NA	NA	NA	NA	Rpl23a-ps5	NA	Trav14n-1
NA	NA	NA	NA	Rpl23a-ps6	NA	Trav14n-2
NA	NA	NA	NA	Rpl23a-ps7	NA	Trav14n-3
NA	NA	NA	NA	Rpl23a-ps8	NA	Trav15-1-dv6-1
NA	NA	NA	NA	Rpl23a-ps9	NA	Trav15-2-dv6-2
NA	NA	NA	NA	Rpl24	NA	Trav15-3
NA	NA	NA	NA	Rpl26	NA	Trav15d-1-dv6d-1
NA	NA	NA	NA	Rpl26-ps1	NA	Trav15d-2-dv6d-2
NA	NA	NA	NA	Rpl26-ps2	NA	Trav15d-3
NA	NA	NA	NA	Rpl26-ps3	NA	Trav15n-1
NA	NA	NA	NA	Rpl26-ps4	NA	Trav15n-2
NA	NA	NA	NA	Rpl26-ps5	NA	Trav15n-3
NA	NA	NA	NA	Rpl26-ps6	NA	Trav16
NA	NA	NA	NA	Rpl27	NA	Trav16d-dv11
NA	NA	NA	NA	Rpl27-ps1	NA	Trav16n
NA	NA	NA	NA	Rpl27-ps2	NA	Trav17
NA	NA	NA	NA	Rpl27-ps3	NA	Trav18
NA	NA	NA	NA	Rpl27a	NA	Trav19
NA	NA	NA	NA	Rpl27a-ps1	NA	Trav2
NA	NA	NA	NA	Rpl27a-ps2	NA	Trav20
NA	NA	NA	NA	Rpl27a-ps4	NA	Trav21-dv12
NA	NA	NA	NA	Rpl28	NA	Trav22
NA	NA	NA	NA	Rpl28-ps1	NA	Trav23
NA	NA	NA	NA	Rpl28-ps2	NA	Trav3-1
NA	NA	NA	NA	Rpl28-ps3	NA	Trav3-2
NA	NA	NA	NA	Rpl28-ps4	NA	Trav3-3
NA	NA	NA	NA	Rpl29	NA	Trav3-4
NA	NA	NA	NA	Rpl29-ps1	NA	Trav3d-2
NA	NA	NA	NA	Rpl29-ps2	NA	Trav3d-3
NA	NA	NA	NA	Rpl29-ps5	NA	Trav3n-2
NA	NA	NA	NA	Rpl3	NA	Trav3n-3
NA	NA	NA	NA	Rpl3-ps1	NA	Trav4-1
NA	NA	NA	NA	Rpl3-ps2	NA	Trav4-2
NA	NA	NA	NA	Rpl30	NA	Trav4-3
NA	NA	NA	NA	Rpl30-ps1	NA	Trav4-4-dv10
NA	NA	NA	NA	Rpl30-ps10	NA	Trav4d-2
NA	NA	NA	NA	Rpl30-ps11	NA	Trav4d-3
NA	NA	NA	NA	Rpl30-ps2	NA	Trav4d-4
NA	NA	NA	NA	Rpl30-ps3	NA	Trav4n-3
NA	NA	NA	NA	Rpl30-ps5	NA	Trav4n-4
NA	NA	NA	NA	Rpl30-ps6	NA	Trav5-1
NA	NA	NA	NA	Rpl30-ps8	NA	Trav5-2
NA	NA	NA	NA	Rpl30-ps9	NA	Trav5-4
NA	NA	NA	NA	Rpl31	NA	Trav5d-2
NA	NA	NA	NA	Rpl31-ps1	NA	Trav5d-3
NA	NA	NA	NA	Rpl31-ps10	NA	Trav5d-4
NA	NA	NA	NA	Rpl31-ps11	NA	Trav5n-2
NA	NA	NA	NA	Rpl31-ps12	NA	Trav5n-3
NA	NA	NA	NA	Rpl31-ps13	NA	Trav5n-4
NA	NA	NA	NA	Rpl31-ps14	NA	Trav6-1
NA	NA	NA	NA	Rpl31-ps15	NA	Trav6-2
NA	NA	NA	NA	Rpl31-ps16	NA	Trav6-3
NA	NA	NA	NA	Rpl31-ps17	NA	Trav6-4
NA	NA	NA	NA	Rpl31-ps18	NA	Trav6-5
NA	NA	NA	NA	Rpl31-ps2	NA	Trav6-6
NA	NA	NA	NA	Rpl31-ps20	NA	Trav6-7-dv9
NA	NA	NA	NA	Rpl31-ps21	NA	Trav6d-3
NA	NA	NA	NA	Rpl31-ps22	NA	Trav6d-4
NA	NA	NA	NA	Rpl31-ps23	NA	Trav6d-5
NA	NA	NA	NA	Rpl31-ps24	NA	Trav6d-6
NA	NA	NA	NA	Rpl31-ps25	NA	Trav6d-7
NA	NA	NA	NA	Rpl31-ps3	NA	Trav6n-5
NA	NA	NA	NA	Rpl31-ps4	NA	Trav6n-6
NA	NA	NA	NA	Rpl31-ps5	NA	Trav6n-7
NA	NA	NA	NA	Rpl31-ps6	NA	Trav7-1
NA	NA	NA	NA	Rpl31-ps7	NA	Trav7-2
NA	NA	NA	NA	Rpl31-ps8	NA	Trav7-3
NA	NA	NA	NA	Rpl31-ps9	NA	Trav7-4
NA	NA	NA	NA	Rpl32	NA	Trav7-5
NA	NA	NA	NA	Rpl32-ps	NA	Trav7-6
NA	NA	NA	NA	Rpl32l	NA	Trav7d-2
NA	NA	NA	NA	Rpl34	NA	Trav7d-3
NA	NA	NA	NA	Rpl34-ps1	NA	Trav7d-4
NA	NA	NA	NA	Rpl34-ps2	NA	Trav7d-5
NA	NA	NA	NA	Rpl35	NA	Trav7d-6
NA	NA	NA	NA	Rpl35-ps1	NA	Trav7n-4
NA	NA	NA	NA	Rpl35a	NA	Trav7n-5
NA	NA	NA	NA	Rpl35a-ps2	NA	Trav7n-6
NA	NA	NA	NA	Rpl35a-ps3	NA	Trav8-1
NA	NA	NA	NA	Rpl35a-ps4	NA	Trav8-2
NA	NA	NA	NA	Rpl35a-ps5	NA	Trav8d-1
NA	NA	NA	NA	Rpl35a-ps6	NA	Trav8d-2
NA	NA	NA	NA	Rpl35a-ps7	NA	Trav8n-2
NA	NA	NA	NA	Rpl36	NA	Trav9-1
NA	NA	NA	NA	Rpl36-ps1	NA	Trav9-2
NA	NA	NA	NA	Rpl36-ps10	NA	Trav9-4
NA	NA	NA	NA	Rpl36-ps12	NA	Trav9d-1
NA	NA	NA	NA	Rpl36-ps2	NA	Trav9d-2
NA	NA	NA	NA	Rpl36-ps3	NA	Trav9d-3
NA	NA	NA	NA	Rpl36-ps4	NA	Trav9d-4
NA	NA	NA	NA	Rpl36-ps7	NA	Trav9n-1
NA	NA	NA	NA	Rpl36-ps8	NA	Trav9n-2
NA	NA	NA	NA	Rpl36-ps9	NA	Trav9n-3
NA	NA	NA	NA	Rpl36a	NA	Trav9n-4
NA	NA	NA	NA	Rpl36a-ps1	NA	Trbd1
NA	NA	NA	NA	Rpl36a-ps2	NA	Trbd2
NA	NA	NA	NA	Rpl36a-ps3	NA	Trbj1-1
NA	NA	NA	NA	Rpl36a-ps4	NA	Trbj1-2
NA	NA	NA	NA	Rpl36al	NA	Trbj1-3
NA	NA	NA	NA	Rpl37	NA	Trbj1-4
NA	NA	NA	NA	Rpl37-ps1	NA	Trbj1-5
NA	NA	NA	NA	Rpl37a	NA	Trbj1-6
NA	NA	NA	NA	Rpl37a-ps2	NA	Trbj1-7
NA	NA	NA	NA	Rpl37rt	NA	Trbj2-1
NA	NA	NA	NA	Rpl38	NA	Trbj2-2
NA	NA	NA	NA	Rpl38-ps1	NA	Trbj2-3
NA	NA	NA	NA	Rpl38-ps2	NA	Trbj2-4
NA	NA	NA	NA	Rpl39	NA	Trbj2-5
NA	NA	NA	NA	Rpl39-ps	NA	Trbj2-6
NA	NA	NA	NA	Rpl39l	NA	Trbj2-7
NA	NA	NA	NA	Rpl3l	NA	Trbv1
NA	NA	NA	NA	Rpl4	NA	Trbv10
NA	NA	NA	NA	Rpl41	NA	Trbv11
NA	NA	NA	NA	Rpl48-ps1	NA	Trbv12-1
NA	NA	NA	NA	Rpl5	NA	Trbv12-2
NA	NA	NA	NA	Rpl5-ps1	NA	Trbv12-3
NA	NA	NA	NA	Rpl5-ps2	NA	Trbv13-1
NA	NA	NA	NA	Rpl6	NA	Trbv13-2
NA	NA	NA	NA	Rpl6l	NA	Trbv13-3
NA	NA	NA	NA	Rpl7	NA	Trbv14
NA	NA	NA	NA	Rpl7-ps7	NA	Trbv15
NA	NA	NA	NA	Rpl7-ps8	NA	Trbv16
NA	NA	NA	NA	Rpl7-ps9	NA	Trbv17
NA	NA	NA	NA	Rpl7a	NA	Trbv18
NA	NA	NA	NA	Rpl7a-ps1	NA	Trbv19
NA	NA	NA	NA	Rpl7a-ps10	NA	Trbv2
NA	NA	NA	NA	Rpl7a-ps11	NA	Trbv20
NA	NA	NA	NA	Rpl7a-ps12	NA	Trbv21
NA	NA	NA	NA	Rpl7a-ps13	NA	Trbv22
NA	NA	NA	NA	Rpl7a-ps14	NA	Trbv23
NA	NA	NA	NA	Rpl7a-ps2	NA	Trbv24
NA	NA	NA	NA	Rpl7a-ps3	NA	Trbv25
NA	NA	NA	NA	Rpl7a-ps4	NA	Trbv26
NA	NA	NA	NA	Rpl7a-ps5	NA	Trbv27
NA	NA	NA	NA	Rpl7a-ps6	NA	Trbv28
NA	NA	NA	NA	Rpl7a-ps7	NA	Trbv29
NA	NA	NA	NA	Rpl7a-ps8	NA	Trbv3
NA	NA	NA	NA	Rpl7a-ps9	NA	Trbv30
NA	NA	NA	NA	Rpl7l1	NA	Trbv31
NA	NA	NA	NA	Rpl7l1-ps1	NA	Trbv4
NA	NA	NA	NA	Rpl8	NA	Trbv5
NA	NA	NA	NA	Rpl9	NA	Trbv6
NA	NA	NA	NA	Rpl9-ps1	NA	Trbv7
NA	NA	NA	NA	Rpl9-ps2	NA	Trbv8
NA	NA	NA	NA	Rpl9-ps3	NA	Trbv9
NA	NA	NA	NA	Rpl9-ps4	NA	Trdd1
NA	NA	NA	NA	Rpl9-ps5	NA	Trdd2
NA	NA	NA	NA	Rpl9-ps6	NA	Trdj1
NA	NA	NA	NA	Rpl9-ps7	NA	Trdj2
NA	NA	NA	NA	Rpl9-ps8	NA	Trdv1
NA	NA	NA	NA	Rpl9-ps9	NA	Trdv2-1
NA	NA	NA	NA	Rplp0	NA	Trdv2-2
NA	NA	NA	NA	Rplp0-ps1	NA	Trdv3
NA	NA	NA	NA	Rplp1	NA	Trdv4
NA	NA	NA	NA	Rplp1-ps1	NA	Trdv5
NA	NA	NA	NA	Rplp2	NA	Trgj1
NA	NA	NA	NA	Rps10	NA	Trgj2
NA	NA	NA	NA	Rps10-ps1	NA	Trgj3
NA	NA	NA	NA	Rps10-ps2	NA	Trgj4
NA	NA	NA	NA	Rps10-ps3	NA	Trgv1
NA	NA	NA	NA	Rps10-ps4	NA	Trgv2
NA	NA	NA	NA	Rps11	NA	Trgv3
NA	NA	NA	NA	Rps11-ps1	NA	Trgv4
NA	NA	NA	NA	Rps11-ps2	NA	Trgv5
NA	NA	NA	NA	Rps11-ps3	NA	Trgv6
NA	NA	NA	NA	Rps11-ps4	NA	Trgv7
NA	NA	NA	NA	Rps11-ps5	NA	NA
NA	NA	NA	NA	Rps12	NA	NA
NA	NA	NA	NA	Rps12-ps1	NA	NA
NA	NA	NA	NA	Rps12-ps10	NA	NA
NA	NA	NA	NA	Rps12-ps11	NA	NA
NA	NA	NA	NA	Rps12-ps12	NA	NA
NA	NA	NA	NA	Rps12-ps13	NA	NA
NA	NA	NA	NA	Rps12-ps14	NA	NA
NA	NA	NA	NA	Rps12-ps15	NA	NA
NA	NA	NA	NA	Rps12-ps16	NA	NA
NA	NA	NA	NA	Rps12-ps17	NA	NA
NA	NA	NA	NA	Rps12-ps18	NA	NA
NA	NA	NA	NA	Rps12-ps19	NA	NA
NA	NA	NA	NA	Rps12-ps2	NA	NA
NA	NA	NA	NA	Rps12-ps20	NA	NA
NA	NA	NA	NA	Rps12-ps21	NA	NA
NA	NA	NA	NA	Rps12-ps22	NA	NA
NA	NA	NA	NA	Rps12-ps23	NA	NA
NA	NA	NA	NA	Rps12-ps24	NA	NA
NA	NA	NA	NA	Rps12-ps26	NA	NA
NA	NA	NA	NA	Rps12-ps3	NA	NA
NA	NA	NA	NA	Rps12-ps4	NA	NA
NA	NA	NA	NA	Rps12-ps5	NA	NA
NA	NA	NA	NA	Rps12-ps6	NA	NA
NA	NA	NA	NA	Rps12-ps7	NA	NA
NA	NA	NA	NA	Rps12-ps9	NA	NA
NA	NA	NA	NA	Rps12l1	NA	NA
NA	NA	NA	NA	Rps13	NA	NA
NA	NA	NA	NA	Rps13-ps1	NA	NA
NA	NA	NA	NA	Rps13-ps2	NA	NA
NA	NA	NA	NA	Rps13-ps4	NA	NA
NA	NA	NA	NA	Rps13-ps5	NA	NA
NA	NA	NA	NA	Rps13-ps6	NA	NA
NA	NA	NA	NA	Rps13-ps7	NA	NA
NA	NA	NA	NA	Rps13-ps8	NA	NA
NA	NA	NA	NA	Rps14	NA	NA
NA	NA	NA	NA	Rps15	NA	NA
NA	NA	NA	NA	Rps15-ps2	NA	NA
NA	NA	NA	NA	Rps15-ps3	NA	NA
NA	NA	NA	NA	Rps15a	NA	NA
NA	NA	NA	NA	Rps15a-ps1	NA	NA
NA	NA	NA	NA	Rps15a-ps2	NA	NA
NA	NA	NA	NA	Rps15a-ps3	NA	NA
NA	NA	NA	NA	Rps15a-ps4	NA	NA
NA	NA	NA	NA	Rps15a-ps5	NA	NA
NA	NA	NA	NA	Rps15a-ps6	NA	NA
NA	NA	NA	NA	Rps15a-ps7	NA	NA
NA	NA	NA	NA	Rps15a-ps8	NA	NA
NA	NA	NA	NA	Rps16	NA	NA
NA	NA	NA	NA	Rps16-ps2	NA	NA
NA	NA	NA	NA	Rps16-ps3	NA	NA
NA	NA	NA	NA	Rps17	NA	NA
NA	NA	NA	NA	Rps17-ps1	NA	NA
NA	NA	NA	NA	Rps18	NA	NA
NA	NA	NA	NA	Rps18-ps1	NA	NA
NA	NA	NA	NA	Rps18-ps2	NA	NA
NA	NA	NA	NA	Rps18-ps3	NA	NA
NA	NA	NA	NA	Rps18-ps4	NA	NA
NA	NA	NA	NA	Rps18-ps5	NA	NA
NA	NA	NA	NA	Rps18-ps6	NA	NA
NA	NA	NA	NA	Rps19	NA	NA
NA	NA	NA	NA	Rps19-ps1	NA	NA
NA	NA	NA	NA	Rps19-ps10	NA	NA
NA	NA	NA	NA	Rps19-ps11	NA	NA
NA	NA	NA	NA	Rps19-ps12	NA	NA
NA	NA	NA	NA	Rps19-ps13	NA	NA
NA	NA	NA	NA	Rps19-ps14	NA	NA
NA	NA	NA	NA	Rps19-ps2	NA	NA
NA	NA	NA	NA	Rps19-ps3	NA	NA
NA	NA	NA	NA	Rps19-ps4	NA	NA
NA	NA	NA	NA	Rps19-ps5	NA	NA
NA	NA	NA	NA	Rps19-ps6	NA	NA
NA	NA	NA	NA	Rps19-ps7	NA	NA
NA	NA	NA	NA	Rps19-ps8	NA	NA
NA	NA	NA	NA	Rps19-ps9	NA	NA
NA	NA	NA	NA	Rps19bp1	NA	NA
NA	NA	NA	NA	Rps2	NA	NA
NA	NA	NA	NA	Rps2-ps10	NA	NA
NA	NA	NA	NA	Rps2-ps11	NA	NA
NA	NA	NA	NA	Rps2-ps12	NA	NA
NA	NA	NA	NA	Rps2-ps13	NA	NA
NA	NA	NA	NA	Rps2-ps2	NA	NA
NA	NA	NA	NA	Rps2-ps3	NA	NA
NA	NA	NA	NA	Rps2-ps4	NA	NA
NA	NA	NA	NA	Rps2-ps5	NA	NA
NA	NA	NA	NA	Rps2-ps6	NA	NA
NA	NA	NA	NA	Rps2-ps7	NA	NA
NA	NA	NA	NA	Rps2-ps8	NA	NA
NA	NA	NA	NA	Rps2-ps9	NA	NA
NA	NA	NA	NA	Rps20	NA	NA
NA	NA	NA	NA	Rps21	NA	NA
NA	NA	NA	NA	Rps23	NA	NA
NA	NA	NA	NA	Rps23-ps1	NA	NA
NA	NA	NA	NA	Rps23-ps2	NA	NA
NA	NA	NA	NA	Rps23rg1	NA	NA
NA	NA	NA	NA	Rps24	NA	NA
NA	NA	NA	NA	Rps24-ps2	NA	NA
NA	NA	NA	NA	Rps24-ps3	NA	NA
NA	NA	NA	NA	Rps25	NA	NA
NA	NA	NA	NA	Rps25-ps1	NA	NA
NA	NA	NA	NA	Rps26	NA	NA
NA	NA	NA	NA	Rps26-ps1	NA	NA
NA	NA	NA	NA	Rps27	NA	NA
NA	NA	NA	NA	Rps27-ps1	NA	NA
NA	NA	NA	NA	Rps27a	NA	NA
NA	NA	NA	NA	Rps27a-ps1	NA	NA
NA	NA	NA	NA	Rps27a-ps2	NA	NA
NA	NA	NA	NA	Rps27l	NA	NA
NA	NA	NA	NA	Rps27rt	NA	NA
NA	NA	NA	NA	Rps28	NA	NA
NA	NA	NA	NA	Rps29	NA	NA
NA	NA	NA	NA	Rps29-ps	NA	NA
NA	NA	NA	NA	Rps3	NA	NA
NA	NA	NA	NA	Rps3a1	NA	NA
NA	NA	NA	NA	Rps3a2	NA	NA
NA	NA	NA	NA	Rps3a3	NA	NA
NA	NA	NA	NA	Rps4l	NA	NA
NA	NA	NA	NA	Rps4l-ps	NA	NA
NA	NA	NA	NA	Rps4x	NA	NA
NA	NA	NA	NA	Rps4x-ps	NA	NA
NA	NA	NA	NA	Rps5	NA	NA
NA	NA	NA	NA	Rps6	NA	NA
NA	NA	NA	NA	Rps6-ps1	NA	NA
NA	NA	NA	NA	Rps6-ps2	NA	NA
NA	NA	NA	NA	Rps6-ps3	NA	NA
NA	NA	NA	NA	Rps6-ps4	NA	NA
NA	NA	NA	NA	Rps6ka1	NA	NA
NA	NA	NA	NA	Rps6ka2	NA	NA
NA	NA	NA	NA	Rps6ka3	NA	NA
NA	NA	NA	NA	Rps6ka4	NA	NA
NA	NA	NA	NA	Rps6ka5	NA	NA
NA	NA	NA	NA	Rps6ka6	NA	NA
NA	NA	NA	NA	Rps6kb1	NA	NA
NA	NA	NA	NA	Rps6kb2	NA	NA
NA	NA	NA	NA	Rps6kc1	NA	NA
NA	NA	NA	NA	Rps6kl1	NA	NA
NA	NA	NA	NA	Rps7	NA	NA
NA	NA	NA	NA	Rps7-ps1	NA	NA
NA	NA	NA	NA	Rps7-ps2	NA	NA
NA	NA	NA	NA	Rps7-ps3	NA	NA
NA	NA	NA	NA	Rps8	NA	NA
NA	NA	NA	NA	Rps8-ps1	NA	NA
NA	NA	NA	NA	Rps8-ps2	NA	NA
NA	NA	NA	NA	Rps8-ps3	NA	NA
NA	NA	NA	NA	Rps8-ps4	NA	NA
NA	NA	NA	NA	Rps8-ps5	NA	NA
NA	NA	NA	NA	Rps9	NA	NA
NA	NA	NA	NA	Rpsa	NA	NA
NA	NA	NA	NA	Rpsa-ps1	NA	NA
NA	NA	NA	NA	Rpsa-ps10	NA	NA
NA	NA	NA	NA	Rpsa-ps11	NA	NA
NA	NA	NA	NA	Rpsa-ps12	NA	NA
NA	NA	NA	NA	Rpsa-ps2	NA	NA
NA	NA	NA	NA	Rpsa-ps3	NA	NA
NA	NA	NA	NA	Rpsa-ps4	NA	NA
NA	NA	NA	NA	Rpsa-ps5	NA	NA
NA	NA	NA	NA	Rpsa-ps6	NA	NA
NA	NA	NA	NA	Rpsa-ps7	NA	NA
NA	NA	NA	NA	Rpsa-ps8	NA	NA
NA	NA	NA	NA	Rpsa-ps9	NA	NA
